# Supplementary material
Source: PubMed Central journal article supplement (PMC4495812)
Supplement: i1552-5783-56-8-4186-s01.pdf [file i1552-5783-56-8-4186-s01.pdf]

### Supplementary Table S1. Table of all tested genes

|     | Gene name:                  |
|-----|-----------------------------|
| 1.  | 18S-Hs99999901_s1           |
| 2.  | 9530053A07Rik-Mm00621000_m1 |
| 3.  | Agr2-Mm00507853_m1          |
| 4.  | Alox15-Mm00507789_m1        |
| 5.  | Arnt-Mm00507836_m1          |
| 6.  | Atoh1-Mm00476035_s1         |
| 7.  | B2m-Mm00437762_m1           |
| 8.  | Bax-Mm00432051_m1           |
| 9.  | Bcar1-Mm00487210_m1         |
| 10. | Bcl2-Mm00477631_m1          |
| 11. | Birc5-Mm00599749_m1         |
| 12. | Car2-Mm00501576_m1          |
| 13. | Casp3-Mm01195085_m1         |
| 14. | Casp8-Mm00802247_m1         |
| 15. | Ccl26-Mm02763057_u1         |
| 16. | Chia-Mm00458221_m1          |
| 17. | Clca3-Mm00489959_m1         |
| 18. | Creb3l1-Mm00496405_m1       |
| 19. | Dll1-Mm01279269_m1          |
| 20. | Dll4-Mm00444619_m1          |
| 21. | Dpp4-Mm00494538_m1          |
| 22. | Egf-Mm00438696_m1           |
| 23. | Egfr-Mm00433023_m1          |
| 24. | Eps8-Mm00514752_m1          |
| 25. | Fasl-Mm00438864_m1          |
| 26. | Fetub-Mm00445538_m1         |
| 27. | Fgf7-Mm00433291_m1          |
| 28. | Foxa1-Mm00484713_m1         |
| 29. | Foxa2-Mm01976556_s1         |
| 30. | Foxa3-Mm00484714_m1         |
| 31. | Foxj1-Mm01267279_m1         |
| 32. | Foxm1-Mm00514924_m1         |
| 33. | Gfi1-Mm00515855_m1          |
| 34. | Hif1a-Mm00468869_m1         |
| 35. | Hoxa5-Mm04213381_s1         |
| 36. | Hprt-Mm01545399_m1          |
| 37. | Ifngr1-Mm00599890_m1        |
| 38. | Il10rb-Mm00434157_m1        |
| 39. | Il13ra1-Mm00446726_m1       |
| 40. | Il13ra2-Mm00515166_m1       |
| 41. | Il19-Mm01288324_m1          |
| 42. | Il1b-Mm00434228_m1          |
| 43. | Il22ra1-Mm01192943_m1       |
| 44. | Il33-Mm00505403_m1          |
| 45. | Il4ra-Mm01275139_m1         |
| 46. | Itln1-Mm00843942_sH         |
| 47. | Jag1-Mm00496902_m1          |
| 48. | Klf4-Mm00516104_m1          |
| 49. | Klf5-Mm00456521_m1          |
| 50. | Krt14-Mm00516876_m1         |
| 51. | Krt7-Mm00466676_m1          |
| 52. | Lepr-Mm00440181_m1          |
| 53. | Maml1-Mm00614627_m1         |
| 54. | Mmp9-Mm00442991_m1          |
| 55. | Muc2-Mm00458299_m1          |
| 56. | Muc5ac-Mm01276718_m1        |
| 57. | Ngf-Mm00443039_m1           |
| 58. | Nkx2-1-Mm00447558_m1        |
| 59. | Nos2-Mm00440502_m1          |
| 60. | Notch1-Mm00435249_m1        |
| 61. | Notch2-Mm00803077_m1        |
| 62. | Paf1-Mm00479859_m1          |
| 63. | Pik3r1-Mm00803160_m1        |
| 64. | Retnlb-Mm00445845_m1        |
| 65. | Runx1-Mm01213404_m1         |
| 66. | Scin-Mm00485972_m1          |
| 67. | Serpinb10-Mm01291800_m1     |
| 68. | Slc26a4-Mm01258316_m1       |

|     |                                       |
|-----|---------------------------------------|
| 69. | Slc39a8-Mm00470855_m1                 |
| 70. | Socs1-Mm00782550_s1                   |
| 71. | Sox2-Mm03053810_s1                    |
| 72. | Sox9-Mm00448840_m1                    |
| 73. | Spdef-Mm00600221_m1                   |
| 74. | Spp1-Mm00436767_m1                    |
| 75. | Sprr1a-Mm01962902_s1                  |
| 76. | Sprr1b-Mm02016340_s1                  |
| 77. | Sprr2a3;Sprr2a1;Sprr2a2-Mm00845122_s1 |
| 78. | Sprr2b-Mm01978041_s1                  |
| 79. | Sprr2d-Mm01620966_s1                  |
| 80. | Sprr2f-Mm00448855_s1                  |
| 81. | Sprr2g-Mm00726827_s1                  |
| 82. | Stat1-Mm00439531_m1                   |
| 83. | Stat6-Mm01160477_m1                   |
| 84. | Stk11-Mm00488470_m1                   |
| 85. | Tff1-Mm00436945_m1                    |
| 86. | Tff2-Mm00447491_m1                    |
| 87. | Tff3-Mm00495590_m1                    |
| 88. | Tgfb1-Mm01178820_m1                   |
| 89. | Tgfb2-Mm00436955_m1                   |
| 90. | Ticam1-Mm00844508_s1                  |
| 91. | Tlr4-Mm00445273_m1                    |
| 92. | Tnf-Mm00443260_g1                     |
| 93. | Tnfsf10-Mm01283606_m1                 |
| 94. | Tslp-Mm01157588_m1                    |
| 95. | Xiap-Mm00776505_m1                    |
